# Supplementary material
Source: PubMed Central journal article supplement (PMC4151243)
Supplement: NIHMS605885-supplement-Supplemental_Table.pdf [file NIHMS605885-supplement-Supplemental_Table.pdf]

## SUPPLEMENTAL MATERIAL

**Supplement Table 1: Baseline characteristics for women with regular non-steroidal anti-inflammatory drug (NSAID) use and those with no use.\***

| Characteristic                                    | NSAID use at baseline (n = 31,433) | No NSAID use at baseline (n = 129,368) | p- value |
|---------------------------------------------------|------------------------------------|----------------------------------------|----------|
| Age, mean years (SD)                              | 63.3 (7.1)                         | 63.2 (7.2)                             | 0.69     |
| Age >70 years, %                                  | 21.6                               | 22.1                                   | 0.03     |
| Race/ethnicity, %                                 |                                    |                                        |          |
| White                                             | 85.2                               | 82.1                                   |          |
| Black or African American                         | 8.8                                | 9.1                                    | <.0001   |
| Hispanic/Latino                                   | 3.6                                | 4.0                                    |          |
| Other incl. missing ETHNIC                        | 2.5                                | 4.9                                    |          |
| Education, %                                      |                                    |                                        |          |
| At most some high school (up to 11 y)             | 5.8                                | 5.2                                    |          |
| High school diploma or GED                        | 17.7                               | 16.9                                   |          |
| Vocational/training to college grad/baccalaureate | 49.6                               | 48.3                                   | <0.0001  |
| At least some post-graduate/professional          | 26.2                               | 28.9                                   |          |
| MISSING                                           | 0.7                                | 0.8                                    |          |
| Income, %                                         |                                    |                                        |          |
| Less than \$19,999                                | 16.9                               | 15.3                                   |          |
| \$20,000 to \$74,999                              | 61.2                               | 60.1                                   | <0.0001  |
| \$75,000 or more                                  | 15.9                               | 17.7                                   |          |
| Don't know or missing INCOME                      | 6.0                                | 6.9                                    |          |
| US Region, %                                      |                                    |                                        |          |
| Northeast                                         | 19.4                               | 23.7                                   |          |
| South                                             | 27.4                               | 25.5                                   | <0.0001  |
| Midwest                                           | 24.9                               | 21.3                                   |          |
| West                                              | 28.3                               | 29.5                                   |          |
| BMI, mean kg/m <sup>2</sup> (SD)                  | 29.4 (6.4)                         | 27.6 (5.8)                             | <0.0001  |
| BMIC, %                                           |                                    |                                        |          |
| Underweight (< 18.5)                              | 0.5                                | 1.0                                    |          |
| Normal (18.5 - 24.9)                              | 26.2                               | 35.9                                   |          |
| Overweight (25.0 - 29.9)                          | 33.5                               | 34.7                                   |          |
| Obesity I (30.0 - 34.9)                           | 21.9                               | 17.5                                   | <0.0001  |
| Obesity II (35.0 - 39.9)                          | 10.6                               | 6.8                                    |          |
| Extreme Obesity III (≥40)                         | 6.6                                | 3.3                                    |          |
| MISSING                                           | 0.8                                | 0.9                                    |          |
| Systolic blood pressure, mm Hg, SD                | 128.7 (17.6)                       | 127.0 (17.8)                           | <0.0001  |
| Systolic blood pressure, %                        |                                    |                                        |          |
| ≤120                                              | 34.7                               | 39.4                                   |          |
| 120 - 140                                         | 42.6                               | 40.4                                   | <0.0001  |
| >140                                              | 22.8                               | 20.2                                   |          |
| Diastolic blood pressure, mm Hg, SD               | 75.5 (9.3)                         | 75.1 (9.3)                             | <0.0001  |

|                                                                       |             |             |         |
|-----------------------------------------------------------------------|-------------|-------------|---------|
| Diastolic blood pressure, %                                           |             |             |         |
| <90                                                                   | 92.8        | 93.2        |         |
| ≥90                                                                   | 7.2         | 6.8         | 0.0257  |
| MISSING                                                               | 0.1         | 0.04        |         |
| TEXPWK: MET-hours/week, SD                                            | 11.4 (13.1) | 12.7 (13.9) | <0.0001 |
| MET-hours/week, %                                                     |             |             |         |
| At most 2 MET-hours/week                                              | 25.9        | 22.3        |         |
| More than 2 but less than 21 MET-hours/week                           | 52.2        | 52.9        | <0.0001 |
| 21 or more MET-hours/week                                             | 17.2        | 20.2        |         |
| TEXPWK missing                                                        | 4.7         | 4.6         |         |
| <hr/>                                                                 |             |             |         |
| History of, %                                                         |             |             |         |
| Hypertension                                                          |             |             |         |
| No                                                                    | 61.0        | 66.8        |         |
| Yes                                                                   | 38.1        | 32.4        | <0.0001 |
| MISSING                                                               | 0.9         | 0.8         |         |
| Hypercholesterolemia                                                  |             |             |         |
| No                                                                    | 79.9        | 81.2        |         |
| Yes                                                                   | 14.3        | 13.1        | <0.0001 |
| MISSING                                                               | 5.9         | 5.8         |         |
| Diabetes mellitus (DM)                                                |             |             |         |
| No                                                                    | 93.1        | 94.3        | <0.0001 |
| Yes                                                                   | 6.9         | 5.7         |         |
| On insulin therapy                                                    |             |             |         |
| No                                                                    | 4.8         | 4.1         |         |
| Yes                                                                   | 2.0         | 1.6         | <0.0001 |
| MISSING (always missing if DM=No)                                     | 93.1        | 94.3        |         |
| Smoking status                                                        |             |             |         |
| Never Smoked                                                          | 48.4        | 50.8        |         |
| Past Smoker                                                           | 43.7        | 41.0        | <0.0001 |
| Current Smoker                                                        | 6.7         | 6.9         |         |
| MISSING                                                               | 1.3         | 1.3         |         |
| Congestive heart failure                                              | 0.9         | 0.8         | 0.07    |
| Myocardial infarction (MI)                                            | 2.3         | 2.3         | 0.48    |
| Within last 6 months                                                  |             |             |         |
| No                                                                    | 2.3         | 2.2         |         |
| Yes                                                                   | 0.1         | 0.1         | 0.76    |
| MISSING (always missing if MI=No)                                     | 97.7        | 97.7        |         |
| Coronary Artery Bypass Graft or<br>Percutaneous Coronary Intervention | 1.7         | 1.7         | 0.97    |
| Stroke or Transient Ischemic Attack                                   | 3.0         | 3.0         | 0.83    |
| Peripheral arterial disease                                           |             |             |         |
| No                                                                    | 96.8        | 97.4        |         |
| Yes                                                                   | 2.6         | 1.9         | <0.0001 |
| MISSING                                                               | 0.6         | 0.7         |         |
| Stomach or duodenal ulcer                                             |             |             |         |
| No                                                                    | 91.7        | 92.3        | <0.0001 |

|                                             |      |      |         |
|---------------------------------------------|------|------|---------|
| Yes                                         | 7.1  | 6.3  |         |
| MISSING                                     | 1.2  | 1.4  |         |
| Bleeding problem                            |      |      |         |
| No                                          | 97.3 | 97.4 |         |
| Yes                                         | 2.7  | 2.5  | 0.12    |
| MISSING                                     | 0.1  | 0.1  |         |
| Arthritis                                   |      |      |         |
| No                                          | 29.1 | 57.6 |         |
| Yes                                         | 70.1 | 41.5 | <0.0001 |
| MISSING                                     | 0.8  | 0.9  |         |
| Rheumatoid arthritis                        |      |      |         |
| Yes                                         | 8.3  | 4.0  |         |
| Other/Don't Know                            | 58.1 | 35.5 | <0.0001 |
| MISSING (always if Arthritis=No)            | 33.7 | 60.5 |         |
| Cancer (excluding non-melanoma skin cancer) |      |      |         |
| No                                          | 89.6 | 90.1 |         |
| Yes                                         | 9.6  | 9.1  | 0.01    |
| MISSING                                     | 0.8  | 0.9  |         |
| Medications, %                              |      |      |         |
| Aspirin                                     | 22.2 | 22.7 | 0.04    |
| Acetaminophen                               | 21.4 | 11.2 | <0.0001 |
| Statin                                      | 8.7  | 7.3  | <0.0001 |
| Menopausal hormones at BL                   |      |      |         |
| No                                          | 49.9 | 56.3 |         |
| Yes                                         | 47.4 | 40.8 | <0.0001 |
| MISSING                                     | 2.7  | 2.9  |         |

\*The Cox-regression utilizes time-varying medication information and does not use the static groups in this table.
